# Supplementary material for: The effect of temperature on fertility: A province-level analysis of monthly total fertility rates in Italy in 2003 – 2022
Source: Research Square preprint supplement (doi:10.21203/rs.3.rs-7743281/v1), 2025-11-03
Supplement: Supplementary file 1 [file 149215f0b1ffea22ce7302ab.docx]

**Supplementary materials**


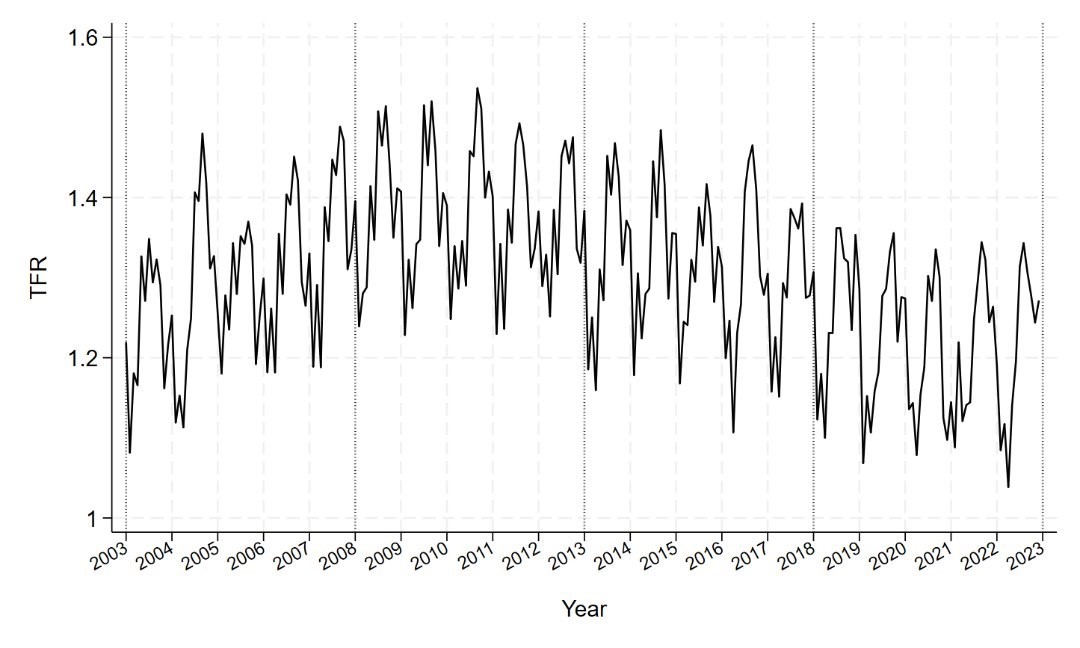
**Fig. A1** Seasonal trends in Italian TFRs. Notes: monthly total fertility rates from January 2003 to December 2022


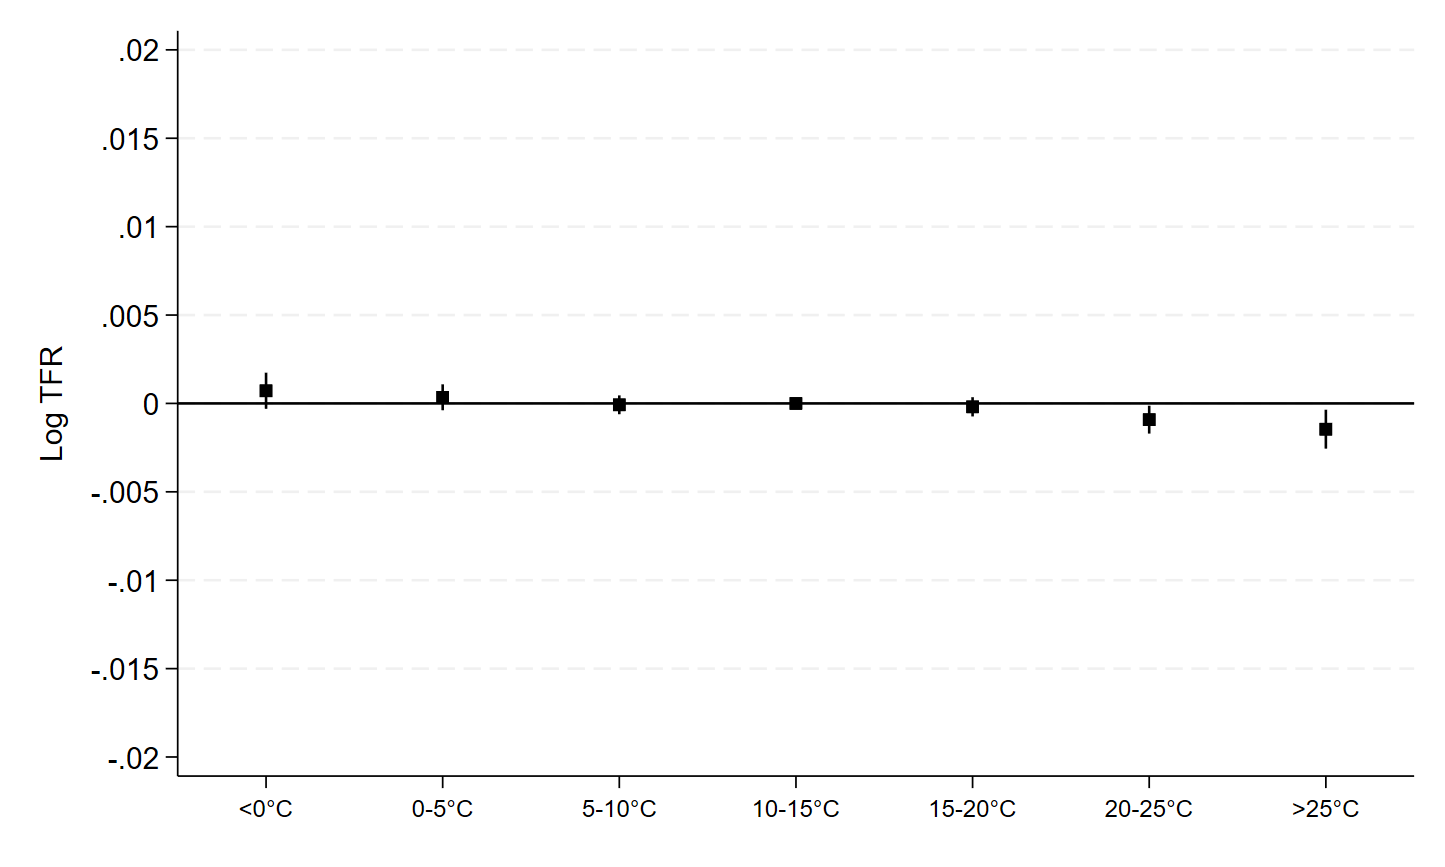
**Fig. A2** Effect of temperature on fertility 10 months after exposure. Notes: coefficients are estimated based on equation (1) with 95% confidence intervals. The figure shows only the coefficients for the 10th month of exposure. The temperature bins of exposure in the other months (0-9 and 11-15) are included in the analysis but not reported in the figure


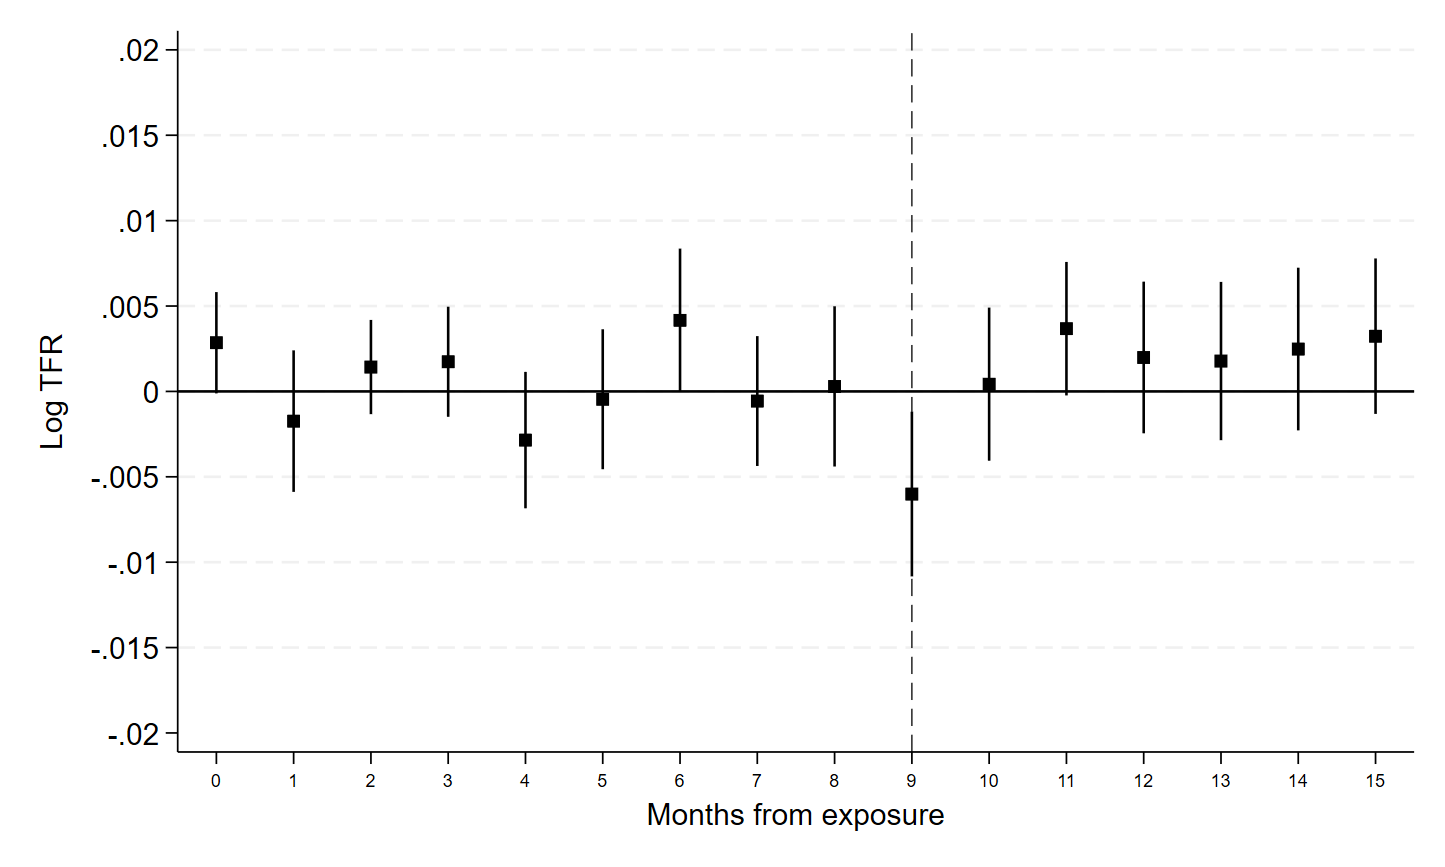
**Fig. A3** Effect of a day with temperature >30°C on fertility 0 – 15 months after exposure. Notes: coefficients are estimated based on equation (1) with 95% confidence intervals. The figure reports only the coefficients for the temperature bin >30°C at different months from exposure. Exposure to the other temperature bins is included in the analysis but not reported in the figure


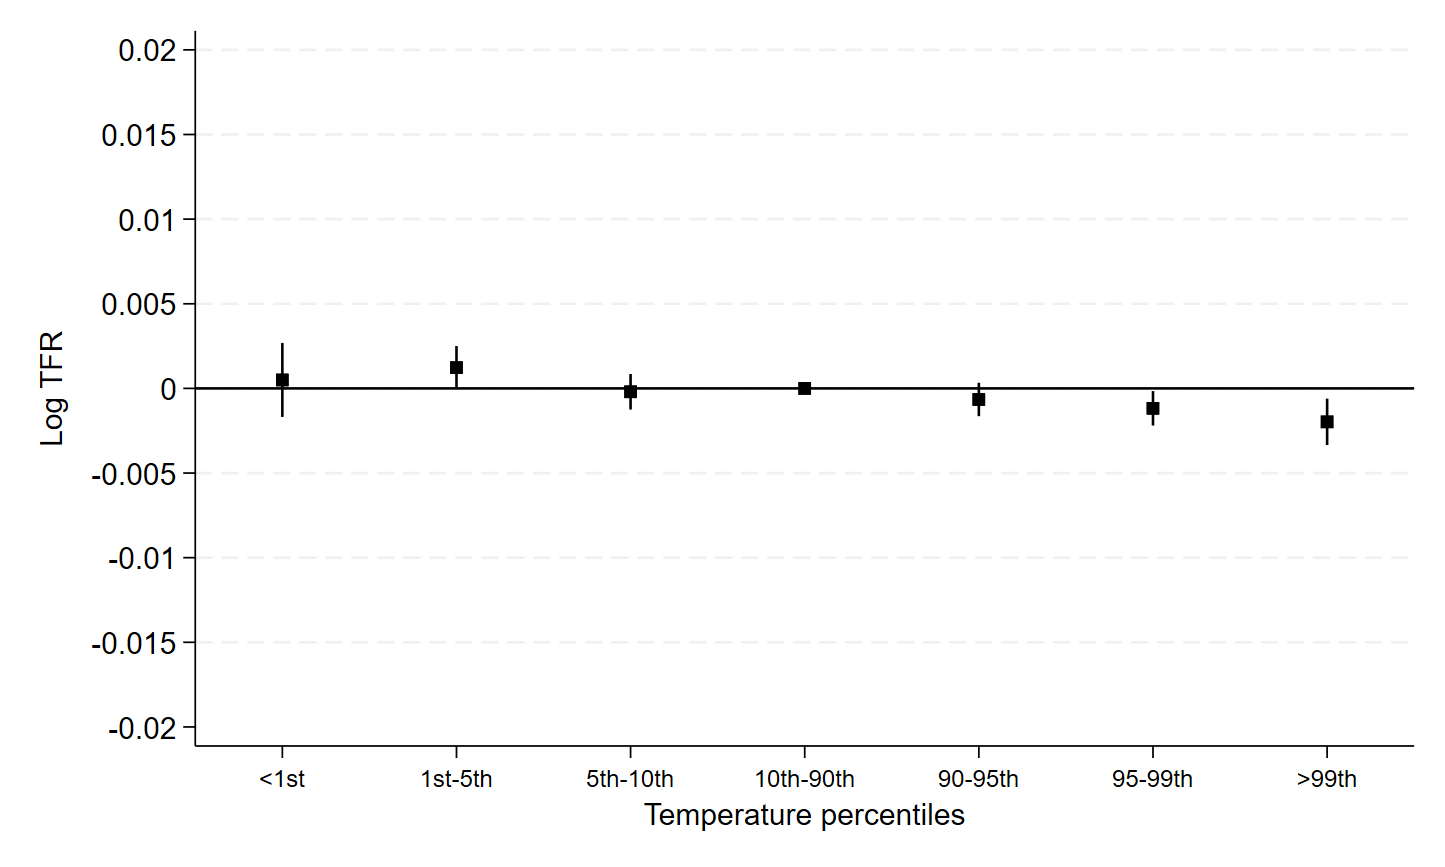
**Fig. A4** Effect of temperature on fertility 9 months after exposure. Notes: coefficients are estimated based on equation (1) with 95% confidence intervals. The figure shows only the coefficients for the 9th month of exposure. The temperature bins of exposure in the other months (0-8 and 10-15) are included in the analysis but not reported in the figure


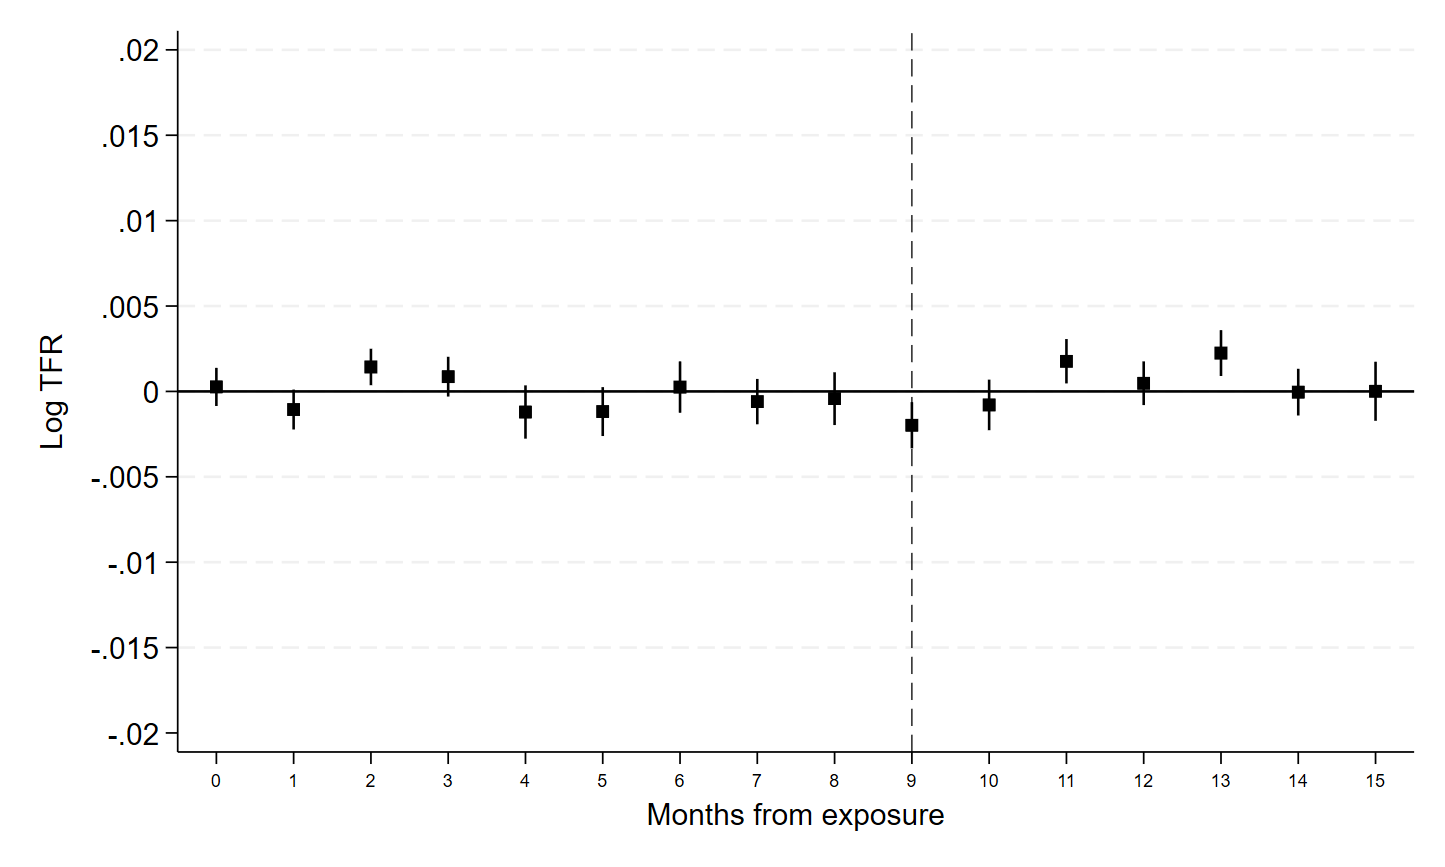
**Fig. A5** Effect of 99th percentile temperature on fertility 0 – 15 months after exposure. Notes: coefficients are estimated based on equation (1) with 95% confidence intervals. The figure reports only the coefficients for the 99th percentile at different months from exposure. Exposure to the other temperature bins is included in the analysis but not reported in the figure


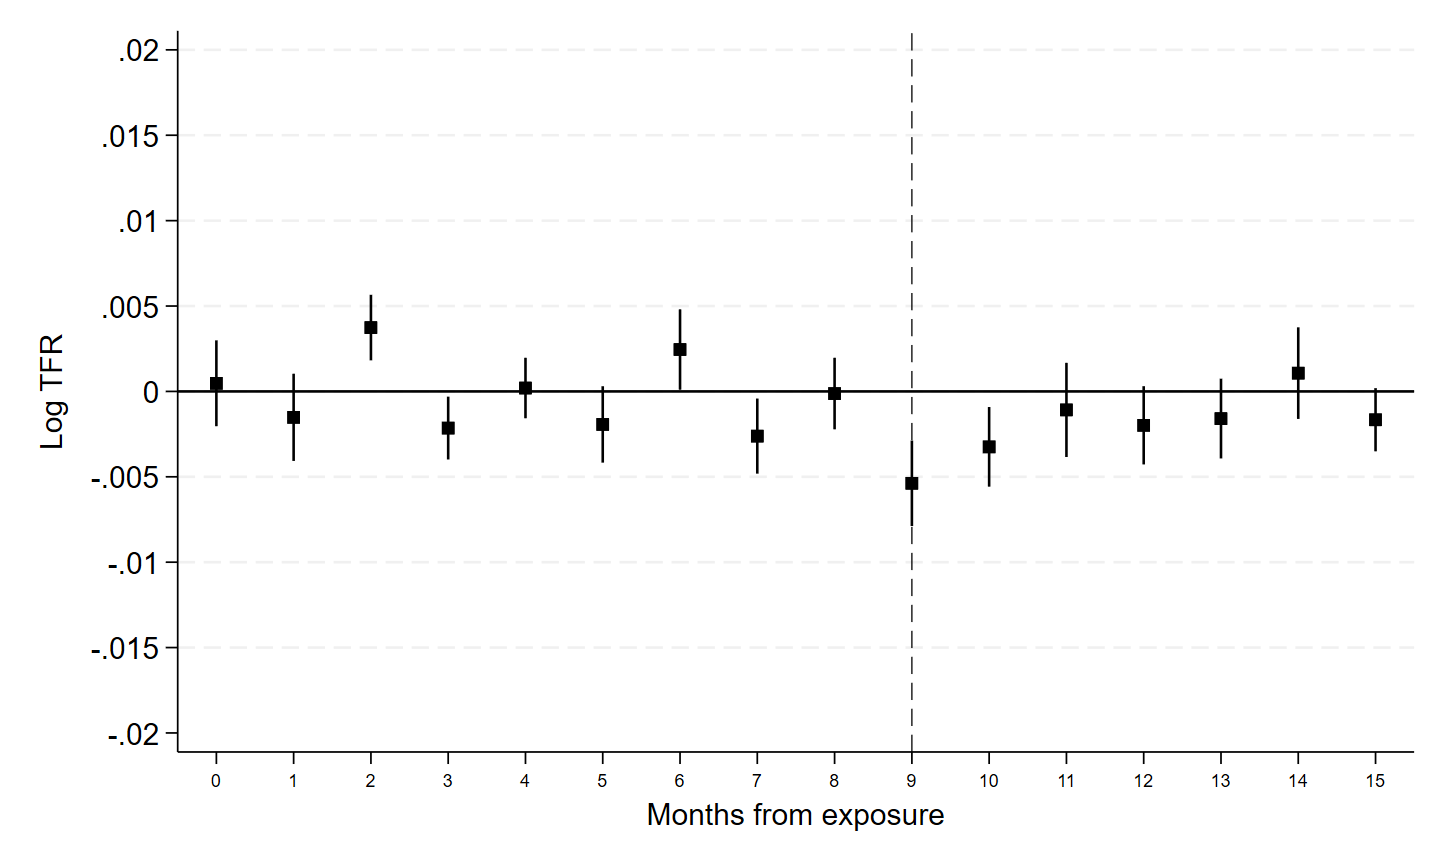
**Fig. A6** Effect of temperature anomalies on fertility 0 – 15 months after exposure. Notes: coefficients are estimated based on equation (1) with 95% confidence intervals. The figure shows the impact of a one standard deviation in temperature


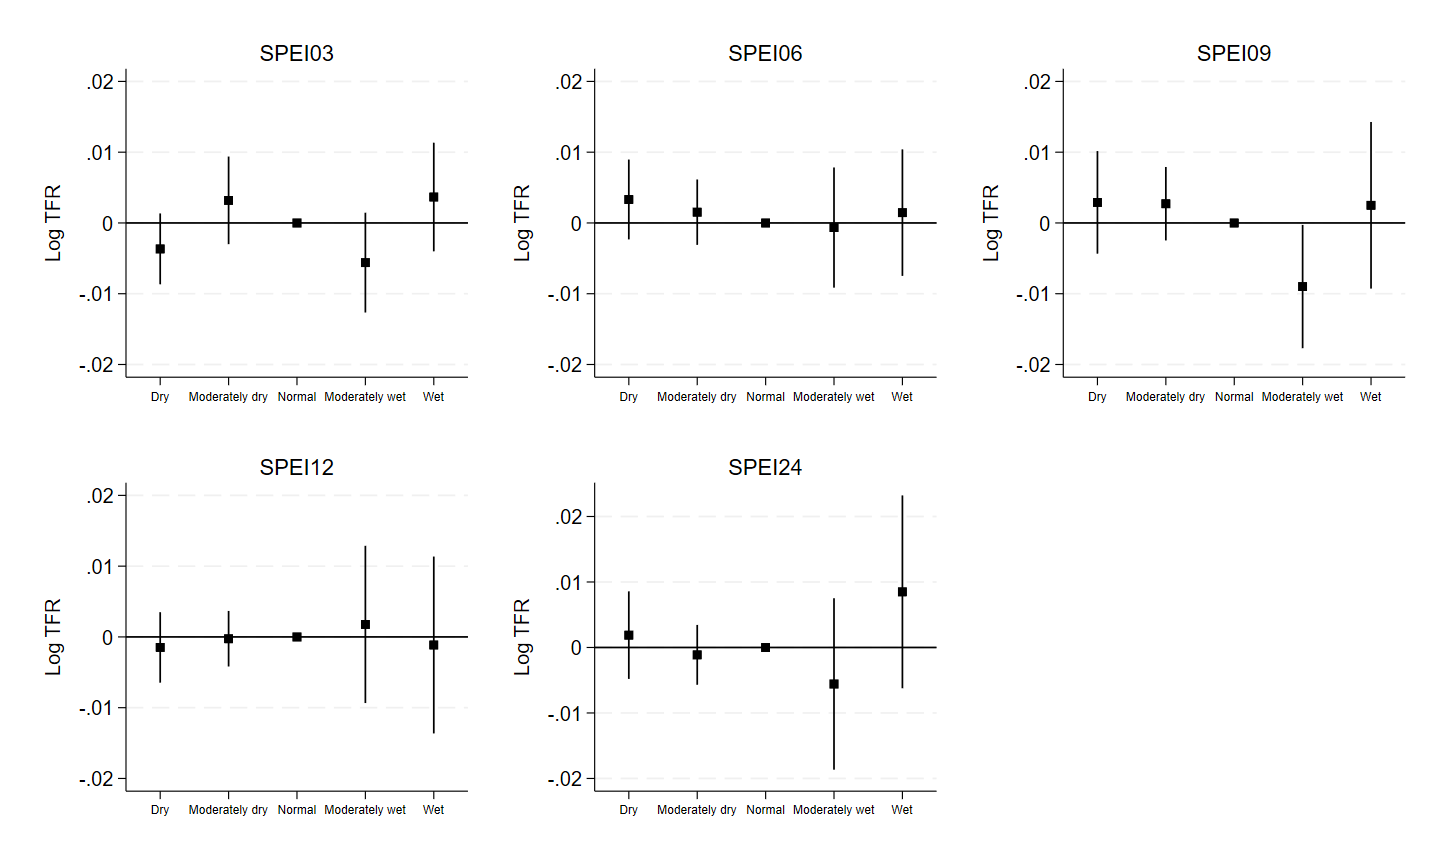
 **Fig. A7** Effect of SPEI on fertility nine months after exposure. Notes: coefficients are estimated based on equation (1) with 95% confidence intervals. The figure shows only the coefficients for the 9th month of exposure. The temperature bins of exposure in the other months (0-8 and 10-15) are included in the analysis but not reported in the figure. The SPEI is calculated from time lags ranging from 3 to 24 months (SPEI03, SPEI06, SPEI09, SPEI12, and SPEI24) to capture drought conditions over both short to long periods
